# Supplementary material
Source: Elsevier journal article supplement (https://www.sciencedirect.com/science/article/pii/S0213911115001028)
Supplement: mmc1 [file S0213911115001028:mmc1.docx]

**Apéndice. Material suplementario**

**Tabla I**

Resultados de la valoración de las preguntas del cuestionario del MSSSI en la primera vuelta, y su adaptación y valoración en la segunda vuelta

| **Preguntas de la primera vuelta** | **Mediana primera vuelta (CV)** | **Preguntas de la segunda vuelta** | **Mediana segunda vuelta (CV)** |
| --- | --- | --- | --- |
| 1. ¿Cómo valora el proceso de acogida en el hospital? | 3,5 (0,37) |  |  |
| 2. ¿Conoce la estructura docente del hospital: comisión de docencia, comités de evaluación, atención al residente por secretaría/jefe de estudios? | 5 (0,24) | 9. La estructura docente del dispositivo de rotación es clara | 4 (0,3) |
| 3. b ¿Cómo valora los siguientes aspectos relacionados con la infraestructura docente del centro? El acceso a los recursos, como por ejemplo a biblioteca, libros (electrónicos), revistas y bases de datos | 5 (0,27) | 6. El residente tiene acceso a recursos del dispositivo, como biblioteca, libros, revistas y bases de datos | 5 (0,23)a |
| 3. a ¿Cómo valora los siguientes aspectos relacionados con la infraestructura docente del centro? La utilidad de la Intranet/página web de docencia | 4 (0,22) |  |  |
| 3. c ¿Cómo valora los siguientes aspectos relacionados con la infraestructura docente del centro? La frecuencia de utilización de los medios de información científica y clínica (material bibliográfico, bases de datos, Internet, historias clínicas…) | 4 (0,38) |  |  |
| 4. ¿Dispone de un plan de formación individual? | 5 (0,06) | 18. Se han marcado objetivos específicos para la rotación | 5 (0,17)a |
| 5. Si ha contestado «sí» en la pregunta anterior, ¿cómo valora la adaptación del plan a los contenidos y al desarrollo de su especialidad? | 5 (0,08) | 11. Las actividades realizadas le han permitido adquirir las competencias establecidas para sus objetivos | 5 (0,13)a |
| 6. a Considerando un máximo de 40 h/semana (a+b), a) ¿cuántas horas semanales dedica a la asistencia, exceptuando guardias? | 3 (0,56) |  |  |
| 6. b Considerando un máximo de 40 h/semana (a+b), b) ¿cuántas horas semanales dedica a otras actividades docentes? | 4 (0,32) |  |  |
| 7. ¿Cómo valora las facilidades que le ha ofrecido el *staff* para el aprendizaje de métodos, técnicas y procedimientos diagnósticos y terapéuticos? | 4 (0,47) |  |  |
| 8. a ¿Cómo valora la formación recibida sobre: a) derechos de los pacientes en aspectos éticos de su ejercicio profesional? | 4 (0,33) |  |  |
| 8. b ¿Cómo valora la formación recibida sobre: b) seguridad del paciente? | 5 (0,41) |  |  |
| 9. ¿Considera que el número de residentes procedentes de otros centros o unidades afecta negativamente a su actividad formativa? | 1 (0,69) |  |  |
| 10. a ¿La actividad asistencial realizada le permite adquirir las competencias establecidas en su plan individual de formación en las siguientes áreas? Bloque quirúrgico | 1 (0,74) |  |  |
| 10. b ¿La actividad asistencial realizada le permite adquirir las competencias establecidas en su plan individual de formación en las siguientes áreas? Consultas externas | 3 (0,64) |  |  |
| 10. c ¿La actividad asistencial realizada le permite adquirir las competencias establecidas en su plan individual de formación en las siguientes áreas? Hospitalización | 4 (0,56) |  |  |
| 11. ¿Cómo valora la formación recibida en su servicio sobre la organización y coordinación con otras unidades/niveles asistenciales que intervienen en los procesos de atención al paciente (UCI, bloque quirúrgico, atención primaria…) | 4 (0,35) |  |  |
| 12. ¿Cómo valora el cumplimiento de su calendario de rotaciones? | 5 (0,24) | 16. Se cumple el calendario establecido durante la rotación | 4 (0,24) |
| 13. ¿Cómo valora la supervisión y el apoyo recibidos por el personal de las unidades por las que ha rotado? | 5 (0,22) |  |  |
| 14. ¿Cómo valora la formación recibida en las rotaciones realizadas por las distintas unidades/servicios del hospital? | 5 (0,14) |  |  |
| SN. Por término medio, ¿cuántas guardias realiza al mes? | 5 (0,17) |  |  |
| 15. a ¿Conoce los protocolos de supervisión del residente: a) en el área de urgencias? | 4 (0,49) |  |  |
| 15. b ¿Conoce los protocolos de supervisión del residente: b) en planta donde realiza las guardias? | 3 (0,52) |  |  |
| 16. a ¿Cómo valora la supervisión y el apoyo del *staff* a) en el área de urgencias? | 3 (0,6) |  |  |
| 16. b ¿Cómo valora la supervisión y el apoyo del *staff* b) en las guardias de planta de su especialidad? | 4 (0,49) |  |  |
| 17. a Para los residentes de primer año: a) ¿La supervisión es de presencia física? | 3,5 (0,52) |  |  |
| 17. b Para los residentes de primer año: b) ¿Normalmente las altas hospitalarias de sus pacientes se firman con el visto bueno del adjunto? | 3 (0,6) |  |  |
| 18. ¿Cree que los criterios de supervisión progresiva se adaptan a su nivel de formación y experiencia? | 4 (0,38) |  |  |
| 19. a ¿Cómo valora la aportación a su formación de la actividad que realiza en guardias a) en el área de urgencias? | 4 (0,52) |  |  |
| 19. b ¿Cómo valora la aportación a su formación de la actividad que realiza en guardias b) en las guardias de planta de su especialidad? | 5 (0,4) |  |  |
| 20. ¿Cómo valora la antelación con que se comunican las sesiones clínicas y bibliográficas? | 4 (0,3) |  |  |
| 21. a ¿Cómo valora el tiempo dedicado a a) sesiones clínicas? | 5 (0,23) | 20. Se realizan sesiones de interés durante la rotación | 4 (0,2) |
| 21. b ¿Cómo valora el tiempo dedicado a b) sesiones bibliográficas? | 5 (0,23) |  |  |
| 22. ¿Cuántos casos clínicos ha presentado? Indicar nº/año | 4 (0,44) |  |  |
| 23. ¿Cómo valora la información recibida sobre actividades de investigación? | 5 (0,08) |  |  |
| 24. ¿Cómo valora el estímulo y el apoyo por parte del *staff* para llevar a cabo trabajos de investigación y publicación? | 5 (0,2) | 14. Recibe motivación, estímulo y apoyo por parte del personal del dispositivo | 5 (0,3)a |
| 25. ¿Participa en actividades o proyectos de investigación? | 5 (0,28) | 13. Además de sus actividades habituales, se le permite participar en otros proyectos o actividades del dispositivo, como investigación o docencia | 4 (0,18)a |
| 26. ¿Asiste a actividades formativas transversales? | 5 (0,12) | *Dimensión incluida en la pregunta nº 2 del cuestionario de la segunda vuelta* | |
| 27. ¿Asiste a otras actividades formativas complementarias, como por ejemplo cursos específicos, conferencias, congresos? | 5 (0,18) | 2. Se le permite participar en actividades formativas complementarias, como sesiones, cursos, conferencias o congresos | 4 (0,19)a |
| 28. ¿Conoce los criterios que se aplican para evaluarle de forma continuada? | 5 (0,14) | 3. Se explican claramente los criterios de evaluación que se aplican en la rotación | 5 (0,2)a |
| 29. ¿Cómo valora la labor de apoyo y tutorización realizada por su tutor principal? | 5 (0,08) | 12. La supervisión se adapta a su nivel de formación y experiencia | 5 (0,08)a |
| 30. Señale con qué periodicidad mantiene entrevistas estructuradas con su tutor principal para valorar los avances y el déficit y posibilitar la incorporación de medidas de mejora en el proceso de formación | 5 (0,37) | 19. Se mantienen entrevistas periódicas con la persona encargada de su formación en este dispositivo | 4 (0,27) |
| 31. ¿Dispone de un libro de residente o documento similar actualizado donde recoge todas las actividades asistenciales, docentes y de investigación realizadas? | 5 (0,35) |  |  |
| 32. ¿Cómo valora la forma de comunicación de las calificaciones obtenidas anualmente? | 3,5 (0,42) |  |  |
| 33. ¿Conoce el mecanismo de tramitación de quejas de los residentes respecto al proceso de docencia? | 5 (0,25) |  |  |
| 34. En caso de que la respuesta anterior sea «sí», ¿cómo valora este mecanismo? | 5 (0,34) |  |  |
| 35. a ¿Le comunican la siguiente información: a) los resultados de la encuesta anual? | 4 (0,23) |  |  |
| 35. b ¿Le comunican la siguiente información: b) las acciones de mejora derivadas? | 4,5 (0,32) |  |  |
| 36. ¿El centro tiene establecidas vías o canales de comunicación para recoger sus opiniones para la mejora del proceso docente? | 5 (0,29) | 5. El centro tiene establecidas vías o canales de comunicación para recoger sus opiniones para la mejora del proceso docente | 4 (0,22) |
| 37. Si tuviera que volver a elegir centro para realizar su residencia, ¿volvería a seleccionar este centro? | 5 (0,3) | 15. Recomendaría esta rotación en este dispositivo a otro residente | 5 (0,2)a |
| 38. ¿Cómo valora globalmente su satisfacción con la Formación Sanitaria Especializada recibida en el centro? | 5 (0,18) | 1. Valore globalmente la formación recibida durante la rotación. | 5 (0,09)a |
|  |  | 4. El ambiente laboral es propicio para la formación del residente | 5 (0,25)a |
|  |  | 8. Existe un espacio apropiado para el residente | 5 (0,26)a |
|  |  | 10. Esta rotación permite la elaboración de algún producto válido para el residente, como comunicaciones, publicaciones o proyecto de investigación | 5 (0,16)a |
|  |  | 17. Se delegan responsabilidades en el residente | 4 (0,14)a |
|  |  | 7. Se ha sentido valorado durante la rotación | 5 (0,19)a |

CV: coeficiente de variación; SN: sin numeración.

a Preguntas con mayor puntuación (mediana) y que, por tanto, pasaron a configurar la herramienta propuesta.
